# Supplementary material
Source: PubMed Central journal article supplement (PMC6460639)
Supplement: 41431_2018_330_MOESM1_ESM.pdf [file 41431_2018_330_MOESM1_ESM.pdf]

**Table S1 supplementary: Genes included in PANEL 1**

| <b>Genes related to NBS conditions</b> |                                                                                                   |                        |            |                 |                |                                |
|----------------------------------------|---------------------------------------------------------------------------------------------------|------------------------|------------|-----------------|----------------|--------------------------------|
| <b>Disorder type</b>                   | <b>DISEASE</b>                                                                                    | <b>Gene</b>            | <b>MIM</b> | <b>Location</b> | <b>Gene ID</b> | <b>GenBank</b>                 |
| Aminoacid metabolism                   | GTP CYCLOHYDROLASE I DEFICIENCY                                                                   | <a href="#">GCH1</a>   | 600225     | 14q22.1-q22.2   | 2643           | <a href="#">NM_000161.2</a>    |
| Aminoacid metabolism                   | HOMOCYSTINURIA DUE TO CYSTATHIONINE BETA-SYNTHASE DEFICIENCY                                      | <a href="#">CBS</a>    | 613381     | 21q22.3         | 875            | <a href="#">NM_001178008.1</a> |
| Aminoacid metabolism                   | HOMOCYSTINURIA, METHIONINE SYNTHASE DEFICIENCY (cbIG COMPLEMENTATION TYPE)                        | <a href="#">MTR</a>    | 156570     | 1q43            | 4548           | <a href="#">NM_000254.2</a>    |
| Aminoacid metabolism                   | HOMOCYSTINURIA, METHIONINE SYNTHASE REDUCTASE DEFICIENCY (cbIE COMPLEMENTATION TYPE)              | <a href="#">MTRR</a>   | 602568     | 5p15.3-p15.2    | 4552           | <a href="#">NM_002454.2</a>    |
| Aminoacid metabolism                   | HYPERHOMOCYSTINEMIA DUE TO DEFICIENCY OF N (5,10)-METHYLENE-TETRAHYDROFOLATE REDUCTASE ACTIVITY   | <a href="#">MTHFR</a>  | 607093     | 1p36.3          | 4524           | <a href="#">NM_005957.4</a>    |
| Aminoacid metabolism                   | HYPERPHENYLALANINEMIA, 6-PYRUVOYL-TETRAHYDROPTERIN SYNTHASE DEFICIENCY                            | <a href="#">PTS</a>    | 612719     | 11q22.3-q23.3   | 5805           | <a href="#">NM_000317.2</a>    |
| Aminoacid metabolism                   | HYPERPHENYLALANINEMIA, DIHYDROPTERIDINE REDUCTASE DEFICIENCY                                      | <a href="#">QDPR</a>   | 612676     | 4p15.31         | 5860           | <a href="#">NM_000320.2</a>    |
| Aminoacid metabolism                   | HYPERPHENYLALANINEMIA, SEPIAPTERIN REDUCTASE DEFICIENCY                                           | <a href="#">SPR</a>    | 182125     | 2p14-p12        | 6697           | <a href="#">NM_003124.4</a>    |
| Aminoacid metabolism                   | HYPERPHENYLALANINEMIA: PTERIN-4-ALPHA-CARBINOLAMINE DEHYDRATASE DEFICIENCY                        | <a href="#">PCBD1</a>  | 126090     | 10q22           | 5092           | <a href="#">NM_000281.2</a>    |
| Aminoacid metabolism                   | MAPLE SYRUP URINE DISEASE (MSUD), DIHYDROLIPOAMIDE BRANCHED-CHAIN TRANSACYLASE                    | <a href="#">DBT</a>    | 248610     | 1p31            | 1629           | <a href="#">NM_001918.3</a>    |
| Aminoacid metabolism                   | MAPLE SYRUP URINE DISEASE, BRANCHED-CHAIN KETO ACID DEHYDROGENASE E1 ALPHA POLYPEPTIDE DEFICIENCY | <a href="#">BCKDHA</a> | 608348     | 19q13.1-q13.2   | 593            | <a href="#">NM_000709.2</a>    |
| Aminoacid metabolism                   | MAPLE SYRUP URINE DISEASE, BRANCHED-CHAIN KETO ACID DEHYDROGENASE E1, BETA POLYPEPTIDE (MSUD),    | <a href="#">BCKDHB</a> | 248611     | 6q13-q15        | 594            | <a href="#">NM_000056.2</a>    |
| Aminoacid metabolism                   | MITOCHONDRIAL PHOSPHATASE PP2Cm DEFICIENCY                                                        | <a href="#">PPM1K</a>  | 611065     | 4q22.1          | 152926         | <a href="#">NM_152542.4</a>    |
| Aminoacid metabolism                   | NON KETOTIC HYPERGLYCINEMIA, AMINOMETHYLTRANSFERASE DEFICIENCY (T PROTEIN)                        | <a href="#">AMT</a>    | 238310     | 3p21.2-p21.1    | 275            | <a href="#">NM_000481.2</a>    |
| Aminoacid metabolism                   | NON KETOTIC HYPERGLYCINEMIA, GLYCINE DECARBOXYLASE DEFICIENCY (P PROTEIN)                         | <a href="#">GLDC</a>   | 238300     | 9p22            | 2731           | <a href="#">NM_000170.2</a>    |
| Aminoacid metabolism                   | PHENYLKETONURIA, PHENYLALANINE HYDROXYLASE DEFICIENCY                                             | <a href="#">PAH</a>    | 261600     | 12q22-q24.2     | 5053           | <a href="#">NM_000277.1</a>    |
| Aminoacid metabolism                   | TYROSINEMIA TYPE I, FUMARYLACETOACETATE DEFICIENCY                                                | <a href="#">FAH</a>    | 276700     | 15q23-q25       | 2184           | <a href="#">NM_000137.2</a>    |
| Aminoacid metabolism                   | TYROSINEMIA TYPE II, TYROSINE AMINOTRANSFERASE DEFICIENCY                                         | <a href="#">TAT</a>    | 613018     | 16q22.1         | 6898           | <a href="#">NM_000353.2</a>    |
| Aminoacid metabolism                   | TYROSINEMIA TYPE III, 4-HYDROXYPHENYLPYRUVATE DIOXYGENASE DEFICIENCY                              | <a href="#">HPD</a>    | 609695     | 12q24.31        | 3242           | <a href="#">NM_002150.2</a>    |
| Energy metabolism                      | DEFICIENCY IN DIHYDROLIPOAMIDE DEHYDROGENASE                                                      | <a href="#">DLD</a>    | 238331     | 7q31-q32        | 1738           | <a href="#">NM_000108.3</a>    |
| Fatty Acid Metabolism                  | 2-METHYLBUTYRYLGLYCINURIA, 2-METHYLBUTYRYL-CoA DEHYDROGENASE DEFICIENCY                           | <a href="#">ACADSB</a> | 600301     | 10q26.13        | 36             | <a href="#">NM_001609.3</a>    |

|                         |                                                                                                                                       |          |        |               |        |             |
|-------------------------|---------------------------------------------------------------------------------------------------------------------------------------|----------|--------|---------------|--------|-------------|
| Fatty Acid Metabolism   | ACYL-CoA DEHYDROGENASE MEDIUM CHAIN DEFICIENCY                                                                                        | ACADM    | 607008 | 1p31          | 34     | NM_000016.5 |
| Fatty Acid Metabolism   | ACYL-CoA DEHYDROGENASE SHORT CHAIN DEFICIENCY                                                                                         | ACADS    | 606885 | 12q22-qter    | 35     | NM_000017.2 |
| Fatty Acid Metabolism   | ACYL-CoA DEHYDROGENASE VERY LONG CHAIN DEFICIENCY                                                                                     | ACADVL   | 609575 | 17p13.1       | 37     | NM_000018.2 |
| Fatty Acid Metabolism   | CARNITINE PALMITOYLTRANSFERASE I DEFICIENCY                                                                                           | CPT1A    | 600528 | 11q13.1-q13.2 | 1374   | NM_001876.3 |
| Fatty Acid Metabolism   | CARNITINE PALMITOYLTRANSFERASE II DEFICIENCY                                                                                          | CPT2     | 600650 | 1p32          | 1376   | NM_000098.2 |
| Fatty Acid Metabolism   | CARNITINE TRANSPORTER DEFICIENCY                                                                                                      | SLC22A5  | 603377 | 5q21          | 6584   | NM_003060.3 |
| Fatty Acid Metabolism   | CARNITINE/ACYLCARNITINE TRANSLOCASE DEFICIENCY                                                                                        | SLC25A20 | 613698 | 3p21.31       | 788    | NM_000387.4 |
| Fatty Acid Metabolism   | ETHYLMALONIC ENCEPHALOPATHY 1: ETHE1 DEFICIENCY                                                                                       | ETHE1    | 23474  | 19q13.31      | 608451 | NM_014297.3 |
| Fatty Acid Metabolism   | ISOBUTYRYL-CoA DEHYDROGENASE DEFICIENCY                                                                                               | ACAD8    | 604773 | 11q25         | 27034  | NM_014384.2 |
| Fatty Acid Metabolism   | LONG-CHAIN 3-HYDROXYACYL-CoA DEHYDROGENASE DEFICIENCY (LCHAD)                                                                         | HADHA    | 600890 | 2p23          | 3030   | NM_000182.4 |
| Fatty Acid Metabolism   | MULTIPLE ACYL CoA DEHYDROGENASE (MADD): ELECTRON TRANSFER FLAVOPROTEIN DEHYDROGENASE (ETFDH) DEFICIENCY. Glutaric acidemia Type II    | ETFDH    | 231675 | 4q32-q35      | 2110   | NM_004453.2 |
| Fatty Acid Metabolism   | MULTIPLE ACYL CoA DEHYDROGENASE (MADD): ELECTRON TRANSFER FLAVOPROTEIN, ALPHA POLYPEPTIDE(ETFA) DEFICIENCY. Glutaric acidemia Type II | ETFA     | 608053 | 15q23-q25     | 2108   | NM_000126.3 |
| Fatty Acid Metabolism   | MULTIPLE ACYL CoA DEHYDROGENASE (MADD): ELECTRON TRANSFER FLAVOPROTEIN, BETA POLYPEPTIDE(ETFB) DEFICIENCY. Glutaric acidemia Type II  | ETFB     | 130410 | 19q13.3       | 2109   | NM_001985.2 |
| Fatty Acid Metabolism   | TRIFUNCTIONAL PROTEIN DEFICIENCY (LCHAD)                                                                                              | HADHB    | 143450 | 2p23          | 3032   | NM_000183.2 |
| Organic Acid Metabolism | 3-METHYLCROTONYL-CoA CARBOXYLASE 1 DEFICIENCY                                                                                         | MCCC1    | 609010 | 3q27          | 56922  | NM_020166.3 |
| Organic Acid Metabolism | 3-METHYLCROTONYL-CoA CARBOXYLASE 2 DEFICIENCY                                                                                         | MCCC2    | 609014 | 5q12-q13      | 64087  | NM_022132.3 |
| Organic Acid Metabolism | HOLOCARBOXYLASE SYNTHETASE DEFICIENCY                                                                                                 | HLCS     | 609018 | 21q22.13      | 3141   | NM_000411.6 |
| Organic Acid Metabolism | METHYLMALONIC ACIDURIA DUE TO METHYLMALONYL-CoA EPIMERASE DEFICIENCY                                                                  | MCEE     | 608419 | 2p13.3        | 84693  | NM_032601.3 |
| Organic Acid Metabolism | 3-HYDROXY-3-METHYLGLUTARYL-CoA LYASE deficiency                                                                                       | HMGCL    | 613898 | 1p36.1-p35    | 3155   | NM_000191.2 |
| Organic Acid Metabolism | AMNIONLESS DEFICIENCY                                                                                                                 | AMN      | 605799 | 14q32.3       | 81693  | NM_030943.3 |
| Organic Acid Metabolism | BETA-KETOTHIOLASE DEFICIENCY                                                                                                          | ACAT1    | 607809 | 11q22.3-q23.1 | 38     | NM_000019.3 |
| Organic Acid Metabolism | GLUTARYL-CoA DEHYDROGENASE DEFICIENCY                                                                                                 | GCDH     | 608801 | 19p13.2       | 2639   | NM_000159.2 |
| Organic Acid Metabolism | ISOVALERIC ACIDEMIA, ISOVALERYL COENZYME A DEHYDROGENASE DEFICIENCY                                                                   | IVD      | 607036 | 15q14-q15     | 3712   | NM_002225.3 |
| Organic Acid Metabolism | MALONYL-CoA DECARBOXYLASE DEFICIENCY                                                                                                  | MLYCD    | 606761 | 16q24         | 23417  | NM_012213.2 |

|                         |                                                                                                    |                 |        |               |        |                |
|-------------------------|----------------------------------------------------------------------------------------------------|-----------------|--------|---------------|--------|----------------|
| Organic Acid Metabolism | METHYLMALONIC ACIDURIA AND HOMOCYSTINURIA, cbIF TYPE                                               | <b>LMBRD1</b>   | 612625 | 6q13          | 55788  | NM_018368.3    |
| Organic Acid Metabolism | METHYLMALONIC ACIDURIA AND HOMOCYSTINURIA, cbIJ TYPE                                               | <b>ABCD4</b>    | 603214 | 14q24.3       | 5826   | NM_005050.3    |
| Organic Acid Metabolism | METHYLMALONIC ACIDURIA AND HOMOCYSTINURIA, CUBILIN DEFICIENCY                                      | <b>CUBN</b>     | 602997 | 10p12.31      | 8029   | NM_001081.3    |
| Organic Acid Metabolism | METHYLMALONIC ACIDURIA AND HOMOCYSTINURIA, INTRINSIC FACTOR DEFICIENCY                             | <b>GIF</b>      | 609342 | 11q13         | 2694   | NM_005142.2    |
| Organic Acid Metabolism | METHYLMALONIC ACIDURIA AND HOMOCYSTINURIA, MMACHC DEFICIENCY (cbIC COMPLEMENTATION TYPE)           | <b>MMACHC</b>   | 609831 | 1p34.1        | 25974  | NM_015506.2    |
| Organic Acid Metabolism | METHYLMALONIC ACIDURIA AND HOMOCYSTINURIA, TRANSCOBALAMIN I DEFICIENCY                             | <b>TCN1</b>     | 189905 | 11q11-q12     | 6947   | NM_001062.3    |
| Organic Acid Metabolism | METHYLMALONIC ACIDURIA AND HOMOCYSTINURIA, TRANSCOBALAMIN II DEFICIENCY                            | <b>TCN2</b>     | 613441 | 22q12.2       | 6948   | NM_000355.2    |
| Organic Acid Metabolism | METHYLMALONIC ACIDURIA AND HOMOCYSTINURIA, TRANSCOBALAMIN RECEPTOR DEFICIENCY                      | <b>CD320</b>    | 606475 | 19p13.3-p13.2 | 51293  | NM_016579.3    |
| Organic Acid Metabolism | METHYLMALONIC ACIDURIA COMBINED WITH HOMOCYSTINURIA, MMADHC DEFICIENCY (cbID COMPLEMENTATION TYPE) | <b>MMADHC</b>   | 611935 | 2q23          | 27249  | NM_015702.1    |
| Organic Acid Metabolism | METHYLMALONIC ACIDURIA DUE TO METHYLMALONYL-CoA MUTASE DEFICIENCY                                  | <b>MUT</b>      | 609058 | 6p12.3        | 4594   | NM_000255.3    |
| Organic Acid Metabolism | METHYLMALONIC ACIDURIA, ADENOSYLTRANSFERASE DEFICIENCY (cbIB COMPLEMENTATION TYPE)                 | <b>MMAB</b>     | 607568 | 12q24         | 326625 | NM_052845.3    |
| Organic Acid Metabolism | METHYLMALONIC ACIDURIA, MMAA DEFICIENCY (cbIA COMPLEMENTATION TYPE)                                | <b>MMAA</b>     | 607481 | 4q31.22       | 166785 | NM_172250.2    |
| Organic Acid Metabolism | METHYLMALONIC ACIDURIA, MMADHC DEFICIENCY (cbID COMPLEMENTATION TYPE)                              | <b>MMADHC</b>   | 611935 | 2q23          | 27249  | NM_015702.1    |
| Organic Acid Metabolism | MEVALONIC ACIDURIA DUE TO MEVALONATE KINASE DEFICIENCY                                             | <b>MVK</b>      | 251170 | 12q24         | 4598   | NM_000431.3    |
| Organic Acid Metabolism | MITOCHONDRIAL DNA DEPLETION WITH METHYLMALONIC ACIDURIA: SUCLA2 DEFICIENCY                         | <b>SUCLA2</b>   | 603921 | 13q12.2-q13.3 | 8803   | NM_003850.2    |
| Organic Acid Metabolism | MITOCHONDRIAL DNA DEPLETION WITH METHYLMALONIC ACIDURIA: SUCLG1 DEFICIENCY                         | <b>SUCLG1</b>   | 611224 | 2p11.2        | 8802   | NM_003849.3    |
| Organic Acid Metabolism | PROPIONIC ACIDEMIA, PROPIONYL-CoA CARBOXYLASE, SUBUNIT A DEFICIENCY                                | <b>PCCA</b>     | 232000 | 13q32         | 5095   | NM_000282.3    |
| Organic Acid Metabolism | PROPIONIC ACIDEMIA, PROPIONYL-CoA CARBOXYLASE, SUBUNIT B DEFICIENCY                                | <b>PCCB</b>     | 232050 | 3q21-q22      | 5096   | NM_000532.4    |
| Urea cycle              | ARGININEMIA: ARGINASE I DEFICIENCY                                                                 | <b>ARG1</b>     | 608313 | 6q23          | 383    | NM_000045.3    |
| Urea cycle              | ARGININEMIA: ARGINASE II DEFICIENCY                                                                | <b>ARG2</b>     | 107830 | 14q24.1       | 384    | NM_001172.3    |
| Urea cycle              | ARGININOSUCCINATE LYASE DEFICIENCY                                                                 | <b>ASL</b>      | 608310 | 7cen-q11.2    | 435    | NM_000048.3    |
| Urea cycle              | CARBAMOYL PHOSPHATE SYNTHETASE DEFICIENCY                                                          | <b>CPS1</b>     | 608307 | 2q35          | 1373   | NM_001122633.1 |
| Urea cycle              | CITRULLINEMIA TYPE II: SLC25A13 TRANSPORTER DEFICIENCY                                             | <b>SLC25A13</b> | 603859 | 7q21.3        | 10165  | NM_014251.2    |
| Urea cycle              | CLASSIC CITRULLINEMIA: ARGININOSUCCINATE SHYNTASE 1 DEFICIENCY                                     | <b>ASS1</b>     | 603470 | 9q34.1        | 445    | NM_000050.4    |

|            |                                       |     |        |        |      |             |
|------------|---------------------------------------|-----|--------|--------|------|-------------|
| Urea cycle | ORNITHINE TRANSCARBAMYLASE DEFICIENCY | OTC | 300461 | Xp21.1 | 5009 | NM_000531.5 |
|------------|---------------------------------------|-----|--------|--------|------|-------------|

## Genes not related to NBS conditions

| Disorder type           | DISEASE                                                                          | Gene           | MIM    | Location      | Gene ID | GenBank     |
|-------------------------|----------------------------------------------------------------------------------|----------------|--------|---------------|---------|-------------|
| Aminoacid metabolism    | ALKAPTONURIA: HOMOGENTISIC ACID OXIDASE DEFICIENCY                               | HGD            | 607474 | 3q13.33       | 3081    | NM_000187.3 |
| Aminoacid metabolism    | BRANCHED-CHAIN KETO ACID DEHYDROGENASE KINASE DEFICIENCY                         | BCKDK          | 614901 | 16p11.2       | 10295   | NM_005881.3 |
| Aminoacid metabolism    | HYPERLYSINEMIA                                                                   | AASS           | 605113 | 7q31.3        | 10157   | NM_005763.3 |
| Aminoacid metabolism    | MULTIPLE MITOCHONDRIAL DYSFUNCTIONS: SYNDROME 1 (MMDS1)                          | NFU1           | 608100 | 2p13.3        | 27247   | NM_015700.2 |
| Carbohydrate Metabolism | PYRUVATE CARBOXYLASE DEFICIENCY                                                  | PC             | 608786 | 11q13.4-q13.5 | 5091    | NM_000920.3 |
| Carbohydrate Metabolism | FRUCTOSEMIA, ALDOLASE B DEFICIENCY                                               | ALDOB          | 612724 | 9q21.3-q22.2  | 229     | NM_000035.3 |
| Carbohydrate Metabolism | GALACTOKINASE 1 DEFICIENCY                                                       | GALK1          | 604313 | 17q24         | 2584    | NM_000154.1 |
| Carbohydrate Metabolism | GALACTOSE-1-PHOSPHATE URIDYLTRANSFERASE DEFICIENCY                               | GALT           | 606999 | 9p13          | 2592    | NM_000155.2 |
| Carbohydrate Metabolism | GLUT1 DEFICIENCY SYNDROME                                                        | SLC2A1 (GLUT1) | 138140 | 1p35-p31.3    | 6513    | NM_006516.2 |
| Carbohydrate Metabolism | UDP-GALACTOSE-4-EPIMERASE DEFICIENCY                                             | GALE           | 606953 | 1p36-p35      | 2582    | NM_000403.3 |
| Creatine deficiency     | CREATINE TRANSPORTER DEFICIENCY                                                  | SLC6A8         | 300036 | Xq28          | 6535    | NM_005629.1 |
| Creatine deficiency     | GUANIDINOACETATE METHYLTRANSFERASE DEFICIENCY                                    | GAMT           | 601240 | 19p13.3       | 2593    | NM_000156.4 |
| Creatine deficiency     | L-ARGININE:GLYCINE AMIDINOTRANSFERASE DEFICIENCY                                 | GATM           | 602360 | 15q21.1       | 2628    | NM_001482.2 |
| Hyperoxaluria           | HYPEROXALURIA TYPE 1, ALANINE-GLYOXYLATE AMINOTRANSFERASE DEFICIENCY             | AGXT           | 604285 | 2q36-q37      | 189     | NM_000030.2 |
| Hyperoxaluria           | HYPEROXALURIA TYPE II, GLYOXYLATE REDUCTASE/HYDROXYPYRUVATE REDUCTASE DEFICIENCY | GRHPR          | 604296 | 9q12          | 9380    | NM_012203.1 |
| Hyperoxaluria           | HYPEROXALURIA TYPE III, 4-HYDROXY-2-OXOGLUTARATE ALDOLASE 1 DEFICIENCY           | HOGA1          | 613597 | 10q24.1       | 112817  | NM_138413.3 |
| Neurotransmitters       | AROMATIC L-AMINO ACID DECARBOXYLASE DEFICIENCY                                   | DDC            | 107930 | 7p11          | 1644    | NM_000790.3 |
| Neurotransmitters       | EPILEPSY PYRIDOXINE-DEPENDENT, ALDEHYDE DEHYDROGENASE 7A1 DEFICIENCY             | ALDH7A1        | 107323 | 5q31          | 110695  | NM_001182.4 |
| Neurotransmitters       | PYRIDOXAMINE 5'-PHOSPHATE OXIDASE DEFICIENCY                                     | PNPO           | 603287 | 17q21.32      | 55163   | NM_018129.3 |
| Neurotransmitters       | SEGAWA SYNDROME, TYROSINE HYDROXYLASE DEFICIENCY                                 | TH             | 191290 | 11p15.5       | 7054    | NM_000360.3 |
| Organic Acid Metabolism | D-2-HYDROXYGLUTARIC ACIDURIA                                                     | D2HGDH         | 609186 | 2q37.3        | 728294  | NM_152783.3 |

|                         |                                                                                                                         |                        |        |              |        |                |
|-------------------------|-------------------------------------------------------------------------------------------------------------------------|------------------------|--------|--------------|--------|----------------|
| Organic Acid Metabolism | D-2-HYDROXYGLUTARIC ACIDURIA TYPE II                                                                                    | <b>IDH2</b>            | 147650 | 15q26.1      | 3418   | NM_002168.2    |
| Organic Acid Metabolism | GLUTARIC ACIDURIA III, SUCCINYL-COA:GLUTARATE-COA TRANSFERASE DEFICIENCY                                                | <b>C7orf10 (SUGCT)</b> | 609187 | 7p14.1       | 79783  | NM_024728.2    |
| Organic Acid Metabolism | L-2- HYDROXYGLUTARIC ACIDURIA: L-2-HYDROXYGLUTARATE DEHYDROGENASE                                                       | <b>L2HGDH</b>          | 609584 | 14q22.1      | 79944  | NM_024884.2    |
| Organic Acid Metabolism | METHYLMALONIC ACIDEMIA AND HOMOCYSTEINEMIA, cbIX type                                                                   | <b>HCFC1</b>           | 300019 | Xq28         | 3054   | NM_005334.2    |
| Purine and Pirimidine   | ADENYLOSUCCINASE DEFICIENCY                                                                                             | <b>ADSL</b>            | 608222 | 22q13.1      | 158    | NM_000026.1    |
| Purine and Pirimidine   | DIHYDROPYRIMIDINE DEHYDROGENASE DEFICIENCY                                                                              | <b>DPYD</b>            | 612779 | 1p22         | 1806   | NM_000110.3    |
| Purine and Pirimidine   | LESCH-NYHAN SYNDROME                                                                                                    | <b>HPRT1</b>           | 308000 | Xq26.1       | 3251   | NM_000194.2    |
| Pyruvate Metabolism     | PYRUVATE DEHYDEOGENASE E2 DEFICIENCY                                                                                    | <b>DLAT</b>            | 608770 | 11q23.1      | 1737   | NM_001931.4    |
| Pyruvate Metabolism     | PYRUVATE DEHYDROGENASE E1-ALPHA DEFICIENCY                                                                              | <b>PDHA1</b>           | 300502 | Xp22.12      | 5160   | NM_00284.3     |
| Pyruvate Metabolism     | PYRUVATE DEHYDROGENASE E1-BETA DEFICIENCY                                                                               | <b>PDHB</b>            | 179060 | 3p21.1-p14.2 | 5162   | NM_000925.3    |
| Pyruvate Metabolism     | PYRUVATE DEHYDROGENASE PDHX                                                                                             | <b>PDHX</b>            | 608769 | 11p13        | 8050   | NM_003477.2    |
| Transporter Disorders   | CYSTINURIA, SLC3A1 TRANSPORTER DEFICIENCY                                                                               | <b>SLC3A1</b>          | 104614 | 2p16.3       | 6519   | NM_000341.3    |
| Transporter Disorders   | CYSTINURIA, SLC7A9 TRANSPORTER DEFICIENCY                                                                               | <b>SLC7A9</b>          | 604144 | 19q13.1      | 11136  | NM_014270.4    |
| Transporter Disorders   | LYSINURIC PROTEIN INTOLERANCE                                                                                           | <b>SLC7A7</b>          | 603593 | 14q11.2      | 9056   | NM_001126106.1 |
| Urea cycle              | HYPERAMMONEMIA DUE TO CARBONIC ANHYDRASE VA DEFICIENCY                                                                  | <b>CA5A</b>            | 114761 | 16q24.3      | 763    | NM_001739.1    |
| Urea cycle              | HYPERORNITHINEMIA-HYPERAMMONEMIA-HOMOCITRULLINEMIA SYNDROME                                                             | <b>SLC25A15</b>        | 603861 | 13q14        | 10166  | NM_014252.3    |
| Urea cycle              | N-ACETYLGUTAMATE SYNTHASE DEFICIENCY                                                                                    | <b>NAGS</b>            | 608300 | 17q21.31     | 162417 | NM_153006.2    |
| Vitamin Disorders       | THIAMINE-RESPONSIVE MEGALOBLASTIC ANEMIA SYNDROME, SOLUTE CARRIER FAMILY 19 (THIAMINE TRANSPORTER), MEMBER 2 DEFICIENCY | <b>SLC19A2</b>         | 603941 | 1q23.3       | 10560  | NM_006996.2    |
| Vitamin Disorders       | BASAL GANGLIA DISEASE, BIOTIN-RESPONSIVE, SOLUTE CARRIER FAMILY 19 (THIAMINE TRANSPORTER), MEMBER 3 DEFICIENCY          | <b>SLC19A3</b>         | 606152 | 2q37         | 80704  | NM_025243.3    |
| Vitamin Disorders       | BROWN-VIALETTO-VAN LAERE SYNDROME 1 AND FAZIO-LONDE DISEASE SOLUTE CARRIER FAMILY 52 (RIBOFLAVIN TRANSPORTER), MEMBER 3 | <b>SLC52A3</b>         | 613350 | 20p13        | 113278 | NM_033409.3    |
| Vitamin Disorders       | BROWN-VIALETTO-VAN LAERE SYNDROME 2 SOLUTE CARRIER FAMILY 52 (RIBOFLAVIN TRANSPORTER), MEMBER 2                         | <b>SLC52A2</b>         | 607882 | 8q24.3       | 79581  | NM_024531.4    |
| Vitamin Disorders       | EXERCISE INTOLERANCE, RIBOFLAVIN-RESPONSIVE, SOLUTE CARRIER FAMILY 25 (MITOCHONDRIAL CARRIER, FOLATE), MEMBER 32        | <b>SLC25A32</b>        | 610815 | 8q22.3       | 81034  | NM_030780.4    |
| Vitamin Disorders       | FLAVIN ADENINE DINUCLEOTIDE SYNTHETASE DEFICIENCY                                                                       | <b>FLAD1</b>           | 610595 | 1q21.3       | 80308  | NM_025207.4    |
| Vitamin Disorders       | RIBOFLAVIN DEFICIENCY, SOLUTE CARRIER FAMILY 52 (RIBOFLAVIN TRANSPORTER), MEMBER 1                                      | <b>SLC52A1</b>         | 607883 | 17p13.2      | 55065  | NM_017986.3    |

|                   |                                                                                                                                          |                 |        |          |       |             |
|-------------------|------------------------------------------------------------------------------------------------------------------------------------------|-----------------|--------|----------|-------|-------------|
| Vitamin Disorders | RIBOFLAVIN KINASE DEFICIENCY                                                                                                             | <b>RFK</b>      | 613010 | 9q21.31  | 55312 | NM_018339   |
| Vitamin Disorders | THIAMINE METABOLISM DYSFUNCTION SYNDROME 4 SOLUTE CARRIER FAMILY 25 (MITOCHONDRIAL THIAMINE PYROPHOSPHATE CARRIER), MEMBER 19 DEFICIENCY | <b>SLC25A19</b> | 606521 | 17q25.3  | 60386 | NM_021734.4 |
| Vitamin Disorders | THIAMINE METABOLISM DYSFUNCTION SYNDROME 5 : THIAMINE PYROPHOSPHOKINASE DEFICIENCY (THMD5)                                               | <b>TPK1</b>     | 606370 | 7q34-q35 | 27010 | NM_022445.3 |
